# Supplementary material
Source: publisher figshare collection journal article supplement (https://frontiersin.figshare.com/ndownloader/files/18024119)
Supplement: Supplementary file 1 [file 18024119]

**Supplementary Table 1.** Characteristic sequencing parameters. T0 indicates the sample taken at the start of the experiment.

| Sample names | bp count | Sequences count | Mean sequence length (bp) | Annotated read number |
| --- | --- | --- | --- | --- |
| T0 | 75,557,163 | 371,221 | 204 ± 86 | 172,814 |
| Maize silage (week 1) | 60,577,816 | 302,856 | 200 ± 88 | 141,031 |
| Maize silage (week 5) | 62,860,596 | 313,928 | 200 ± 86 | 152,545 |
| Maize silage (week 9) | 60,921,404 | 306,610 | 199 ± 89 | 143,651 |
| Maize silage (week 12) | 67,687,628 | 330,283 | 205 ± 85 | 165,912 |
| Maize silage (week 16) | 78,431,701 | 381,780 | 205 ± 86 | 194,949 |
| *Ch. vulgaris* (week 1) | 93,190,586 | 463,807 | 201 ± 86 | 209,604 |
| *Ch. vulgaris* (week 5) | 61,957,981 | 310,248 | 200 ± 88 | 147,612 |
| *Ch. vulgaris* (week 9) | 68,102,839 | 328,991 | 207 ± 83 | 157,529 |
| *Ch. vulgaris* (week 12) | 67,651,236 | 332,953 | 203 ± 88 | 150,453 |
| *Ch. vulgaris* (week 16) | 59,798,943 | 289,708 | 206 ± 84 | 131,012 |
| Co-digestion (week 1) | 53,776,327 | 273,595 | 197 ± 88 | 123,416 |
| Co-digestion (week 5) | 58,538,323 | 298,471 | 196 ± 87 | 132,138 |
| Co-digestion (week 9) | 65,466,773 | 331,079 | 198 ± 89 | 147,090 |
| Co-digestion (week 12) | 68,112,370 | 327,783 | 208 ± 83 | 162,970 |
| Co-digestion (week 16) | 78,431,701 | 381,780 | 205 ± 86 | 163,008 |
